# Supplementary material for: The effect of key DNA methylation in different regions on gene expression in hepatocellular carcinoma
Source: Royal Society of Chemistry journal article supplement (doi:10.1039/d1mo00282a), 2021-11-15
Supplement: d1mo00282a2.pdf [file d1mo00282a2.pdf]

## Supplementary Information for

### The effect of key DNA methylation in different regions on gene expression in hepatocellular carcinoma

**Fig. S1** Kaplan-Meier curve analysis of the high expression group and low expression group of four key genes.

**Table S1** Clinical information of LIHC patients in this study

| Clinical character |         | Number | Percent (%) |
|--------------------|---------|--------|-------------|
| Age                | <=50    | 76     | 20.88       |
|                    | >50     | 288    | 79.12       |
| Gender             | Male    | 245    | 67.31       |
|                    | Female  | 119    | 32.69       |
| Pathologic M       | M0      | 262    | 71.98       |
|                    | M1      | 3      | 0.82        |
|                    | Unknown | 99     | 27.20       |
| Pathologic N       | N0      | 247    | 67.86       |
|                    | N1      | 4      | 1.10        |
|                    | Unknown | 113    | 31.04       |
| Pathologic T       | T1      | 179    | 49.18       |
|                    | T2      | 91     | 25.00       |
|                    | T3      | 78     | 21.43       |
|                    | T4      | 13     | 3.57        |
|                    | Unknown | 3      | 0.82        |
| Pathologic stage   | I       | 169    | 46.43       |
|                    | II      | 84     | 23.08       |
|                    | III     | 83     | 22.80       |
|                    | IV      | 4      | 1.10        |
|                    | Unknown | 24     | 6.59        |
| Vital status       | Dead    | 130    | 35.71       |
|                    | Alive   | 234    | 64.29       |

Abbreviations: LIHC: Liver hepatocellular carcinoma.

**Table S2** Univariate Cox regression analyses of gene associated with survival prognosis in HCC

| Gene | Coefficient | HR (95% CI for HR) | P value |
|------|-------------|--------------------|---------|
|------|-------------|--------------------|---------|

---

|                |        |                  |          |
|----------------|--------|------------------|----------|
| <i>CDC20</i>   | 0.340  | 1.40 (1.20-1.60) | 8.60E-08 |
| <i>RRM2</i>    | 0.340  | 1.40 (1.20-1.70) | 2.70E-05 |
| <i>SPP1</i>    | 0.130  | 1.10 (1.10-1.20) | 3.70E-06 |
| <i>MAD2L1</i>  | 0.540  | 1.70 (1.30-2.20) | 1.10E-05 |
| <i>LAPTM4B</i> | 0.280  | 1.30 (1.20-1.50) | 4.30E-05 |
| <i>SFN</i>     | 0.150  | 1.20 (1.10-1.30) | 0.00022  |
| <i>UBE2C</i>   | 0.270  | 1.30 (1.20-1.50) | 2.00E-05 |
| <i>KIF15</i>   | 0.590  | 1.80 (1.40-2.30) | 1.00E-05 |
| <i>SLC22A1</i> | -0.120 | 0.89 (0.83-0.95) | 0.00047  |
| <i>FEN1</i>    | 0.360  | 1.40 (1.20-1.70) | 0.00017  |
| <i>GRM4</i>    | 2.900  | 19.0 (4.20-82.0) | 0.00011  |
| <i>ROBO1</i>   | 0.190  | 1.20 (1.10-1.40) | 0.0052   |
| <i>CDKN2C</i>  | 0.260  | 1.30 (1.10-1.50) | 0.0019   |
| <i>EGF</i>     | 0.480  | 1.60 (1.20-2.20) | 0.0035   |
| <i>AKR1B10</i> | 0.077  | 1.10 (1.00-1.10) | 0.0061   |
| <i>MMP3</i>    | 0.500  | 1.60 (1.20-2.30) | 0.0026   |
| <i>CDKN3</i>   | 0.260  | 1.30 (1.10-1.50) | 0.0010   |
| <i>E2F1</i>    | 0.220  | 1.20 (1.10-1.40) | 0.0011   |
| <i>FRAS1</i>   | 0.300  | 1.40 (1.10-1.70) | 0.0032   |
| <i>GRM8</i>    | 0.560  | 1.80 (1.20-2.50) | 0.0014   |
| <i>CSMD1</i>   | 0.680  | 2.00 (1.20-3.20) | 0.0063   |

---

Abbreviations: HCC: Hepatocellular carcinoma. HR: hazard ratio. CI: confidence interval.
