# Supplementary figures and images for: The effect of key DNA methylation in different regions on gene expression in hepatocellular carcinoma
Source: Royal Society of Chemistry journal article supplement (doi:10.1039/d1mo00282a), 2021-11-15

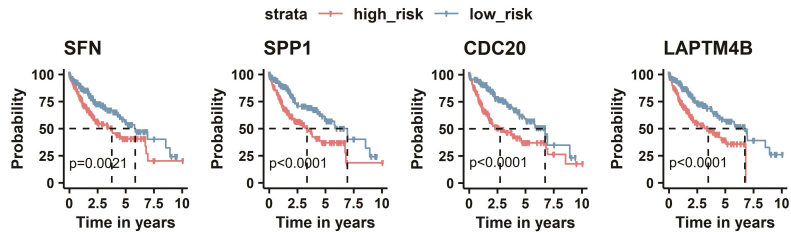

Supplement: d1mo00282a1.pdf [file d1mo00282a1.pdf]
